# Supplementary material for: The establishment of PD-1 inhibitor treatment prognosis model based on dynamic changes of peripheral blood indexes in patients with advanced lung squamous cell carcinoma
Source: Front Oncol. 2024 Dec 17;14:1454709. doi: 10.3389/fonc.2024.1454709 (PMC11685080; doi:10.3389/fonc.2024.1454709)
Supplement: Supplementary file 5 [file Table3.xlsx]

## Sheet: Sheet1
Supplementary table 3. Multivariable Logistic regression models for DCR and ORR.
	ORR		DCR
	Multivariate analysis		Multivariate analysis
Parameters	Hazard ratio (95%CI)	P value	Hazard ratio (95%CI)	P value
SCC0w (<3.15 ng/mL vs ≥3.15 ng/mL)	1.986(0.665-5.927)	0.219	1.321(0.564-3.098)	0.521
SCC6w (<1.25 ng/mL vs ≥1.2ng/mL)	2.324(0.802-6.734)	0.12	1.031(0.455-2.337)	0.941
SCC12w (<2.25 ng/mL vs ≥2.25 ng/mL)	1.1816(0.478-6.891)	0.381	0.548(0.197-1.526)	0.25
CEA0w (<4.55 ng/mL vs ≥4.55 ng/mL)	0.467(0.153-1.430)	0.182	0.588(0.240-1.440)	0.245
CEA6w (<3.41 ng/mL vs ≥3.41 ng/mL)	0.650(0.225-1.876)	0.426	1.421(0.605-3.345)	0.42
CEA12w (<5.34 ng/mL vs ≥5.34 ng/mL)	1.603(0.525-4.895)	0.407	0.983(0.415-2.330)	0.97
NSE0w (<22.3 ng/mL vs ≥22.3 ng/mL)	0.447(0.116-1.722)	0.242	0.463(0.139-1.539)	0.209
NSE6w (<13.54 ng/mL vs ≥13.54 ng/mL)	0.903(0.338-2.411)	0.838	0.951(0.434-2.082)	0.899
NSE12w (<14.55 ng/mL vs ≥14.55 ng/mL)	0.497(0.194-1.274)	0.145	1.595(0.743-3.423)	0.231
Hb0w (<119.50 g/L vs ≥119.50 g/L)	0.974(0.271-3.495)	0.994	0.805(0.323-2.008)	0.642
Hb6w (<117.50 g/L vs ≥117.50 g/L)	1.194(0.704-2.026)	0.875	1.677(0.601-4.684)	0.324
Hb12w (<173.00 g/L vs ≥173.00 g/L)	/	/	/	/
LDH0w (<187.50 U/L vs ≥187.50 U/L)	1.005(0.356-2.843)	0.826	1.414(0.685-2.916)	0.349
LDH6w (<241.50 U/L vs ≥241.50 U/L)	0.441(0.133-1.463)	0.181	1.159(0.393-3.417)	0.789
LDH12w (<191.50 U/L vs ≥191.50 U/L)	1.172(0.476-2.888)	0.73	0.555(0.271-1.136)	0.107
WBC0w (<5.39×109/L vs ≥5.39×109/L)	0.991(0.256-3.375)	0.999	1.215(0.110-13.434)	0.874
WBC6w (<9.34×109/L vs ≥9.34×109/L)	1.319(0.397-4.387)	0.651	2.510(1.997-6.322)	0.041
WBC12w (<5.88×109/L vs ≥5.88×109/L)	0.835(0.360-1.939)	0.675	0.843(0.422-1.648)	0.628
RBC0w (<5.81×1012/L vs ≥5.81×1012/L)	1.629(0.572-7.102)	0.999	5.273(0.247-112.770)	0.287
RBC6w (<4.20×1012/L vs ≥4.20×1012/L)	1.623(0.644-4.092)	0.304	1.063(0.514-2.195)	0.87
RBC12w (<3.81×1012/L vs ≥3.81×1012/L)	0.405(0.155-0.971)	0.034	0.787(0.384-1.611)	0.512
